# Supplementary material for: Ghrelin Bridges DMV Neuropathology and GI Dysfunction in the Early Stages of Parkinson's Disease
Source: PubMed Central journal article supplement (PMC9596842; doi:10.1002/advs.202203020), 2022-09-01
Supplement: ADVS-9-2203020-s001.pdf [file ADVS-9-2203020-s001.pdf]

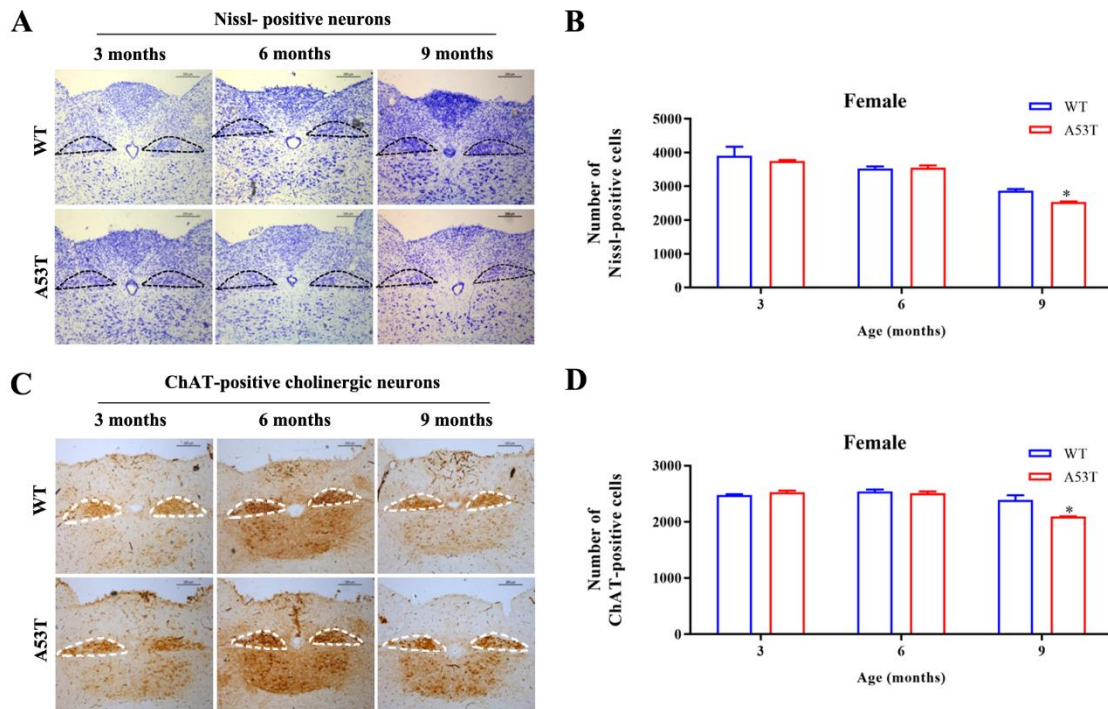

**S1. Neurons loss in the DMV in heterozygous female A53T and WT mice at various ages. A:** Representative images of Nissl-positive cells that stained by Nissl of female heterozygous A53T mice at various ages. Encircled areas: DMV region. Scale bar: 100  $\mu$ m. **B:** Statistical analysis of Nissl-positive cells of female heterozygous A53T mice. Statistical analysis was a Two-way ANOVA (Df =1, F=2.642,  $P$ =0.13, for genotype; Df =2, F=48.24,  $P$ <0.0001, for age), followed by t-test between A53T and WT at each age. **C:** Representative images of ChAT-positive cells that stained by ChAT antibody of female heterozygous A53T mice at various ages. Encircled areas: DMV region. Scale bar: 100  $\mu$ m. **D:** Statistical analysis of ChAT-positive cells that stained by ChAT antibody of female heterozygous A53T. Statistical analysis was a Two-way ANOVA (Df =1, F=7.149,  $P$ =0.0223, for genotype; Df =2, F=28.47,  $P$ <0.0001, for age), followed by t-test between A53T and WT at each age. All data were presented as mean  $\pm$  SEM. (t-test, \* $P$  < 0.05, A53T vs. WT littermates at the same age),  $n \geq 6$  for each group.
